# Supplementary material for: Lead removal from solution by a porous ceramisite made from bentonite, metallic iron, and activated carbon
Source: Royal Society of Chemistry journal article supplement (doi:10.1039/c5ew00091b), 2015-01-01
Supplement: c5ew00091b1.pdf [file c5ew00091b1.pdf]

### **Supplementary information**

**Figure S1** Variations of total soluble Fe at 100 mg/L  $\text{Pb}^{2+}$  with different initial solution pH (3.0, 3.8, 4.7, and 5.7).

**Figure S2** Variations of total soluble Fe at initial pH 4.7 with different initial  $\text{Pb}^{2+}$  concentrations (50, 100, and 200 mg/L).

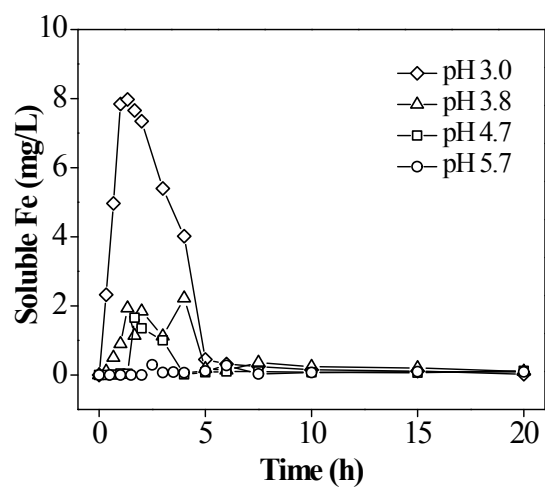

**Figure S1** Variations of total soluble Fe at 100 mg/L  $Pb^{2+}$  (ceramisite dosage 10 g/L) with different initial solution pH (3.0, 3.8, 4.7, and 5.7).

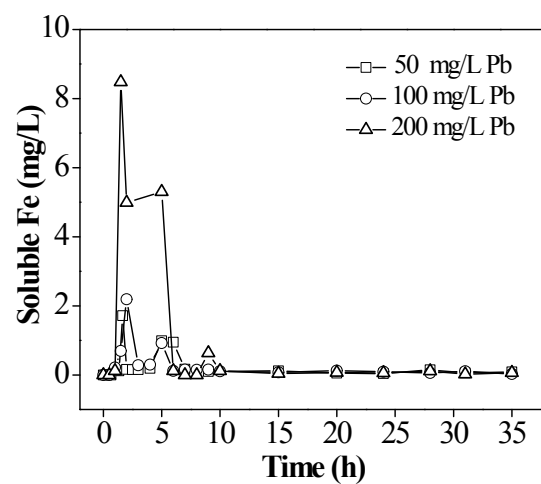

**Figure S2** Variations of total soluble Fe at initial pH 4.7 (ceramisite dosage 5 g/L) with different initial Pb<sup>2+</sup> concentrations (50, 100, and 200 mg/L).
